# Supplementary material for: Sensitization of bismuth tungstate with magnesium phthalocyanine for photoinduced charge redistribution and electron localization: CO2photoreduction from the vis to NIR region
Source: Royal Society of Chemistry journal article supplement (doi:10.1039/d2tc03859e), 2022-12-08
Supplement: d2tc03859e1.pdf [file d2tc03859e1.pdf]

## Supporting Information

# **Sensitization of Bismuth Tungstate with Magnesium Phthalocyanine for Photoinduced Charge Redistribution and Electron Localization: CO<sub>2</sub> photoreduction from Vis to NIR Region**

Yee Wen Teh, <sup>[a]</sup> Wei Kean Chong, <sup>[a]</sup> Chen-Chen Er, <sup>[a]</sup> Xin Ying Kong, <sup>[b]</sup> Boon-Junn Ng, <sup>[a]</sup>  
Siek-Ting Yong, <sup>[a]</sup> Siang-Piao Chai <sup>\*[a]</sup>

<sup>a</sup>Multidisciplinary Platform of Advanced Engineering, Chemical Engineering Discipline, School  
of Engineering, Monash University Malaysia, Jalan Lagoon Selatan, Bandar Sunway, 47500  
Selangor, Malaysia.

<sup>b</sup>School of Chemistry, Chemical Engineering and Biotechnology, Nanyang Technological  
University, 21 Nanyang Link, 637371, Singapore.

**Table S1.** Comparison studies of photocatalytic CH<sub>4</sub> production yield of Bi<sub>2</sub>WO<sub>6</sub> catalysts and metal phthalocyanine sensitized photocatalysts.

| Photocatalysts                                                                | CH <sub>4</sub> yield (μmol/g·h) | Light source                                 | References                                                  |
|-------------------------------------------------------------------------------|----------------------------------|----------------------------------------------|-------------------------------------------------------------|
| Oxygen defect Bi <sub>2</sub> WO <sub>6</sub> nanoplatelets                   | 0.54                             | 500 W Xenon lamp, Vis (λ > 400 nm)           | Chem. Commun., 2016, <b>52</b> , 14242.                     |
| CQDs-Bi <sub>2</sub> WO <sub>6</sub>                                          | 0.90                             | 500 W Xenon lamp, Vis (λ > 400 nm)           | Nano Res., 2017, <b>10</b> , 1720.                          |
| Bi <sub>2</sub> WO <sub>6</sub> nanotubes                                     | 0.13                             | 300 W Xenon lamp                             | RSC Adv., 2020, <b>10</b> , 8821-8824                       |
| Cl-modified Bi <sub>2</sub> WO <sub>6</sub> nanosheets                        | 1.65                             | 300 W Xenon lamp                             | ACS Appl. Mater. Interfaces, 2020, <b>12</b> , 54507-54516. |
| Z-scheme Bi <sub>2</sub> WO <sub>6</sub> /Au/CdS                              | ~0.75                            | 300 W Xenon lamp, Vis (λ > 400 nm)           | Nanotechnology, 2017, <b>28</b> , 274002                    |
| Atomically thin Bi <sub>2</sub> WO <sub>6</sub> nanosheets                    | 0.63                             | 300 W Xenon lamp, AM 1.5                     | Appl. Catal., 2021, <b>283</b> , 119630.                    |
| Z-scheme Cs <sub>2</sub> AgBiBr <sub>6</sub> /Bi <sub>2</sub> WO <sub>6</sub> | 0.41                             | 300 W Xenon lamp, AM 1.5                     | J. Colloid Interface Sci., 2023, <b>629</b> , 233-242       |
| Z-scheme Bi <sub>2</sub> WO <sub>6</sub> /InVO <sub>4</sub>                   | 1.13                             | 300 W Xenon lamp, Vis (λ > 420 nm)           | Chem. Eng. J., 2022, <b>446</b> , 137129                    |
| FePc-WO <sub>3</sub> nanocomposites                                           | ~1.50                            | 300 W Xenon lamp                             | Appl. Catal. B, 2020, <b>270</b> , 11849                    |
| CuPc/g-C <sub>3</sub> N <sub>4</sub> heterojunctions                          | ~0.25                            | 500 W Xenon lamp, Vis (λ > 420 nm)           | Appl. Catal. B, 2020, <b>277</b> , 119199                   |
| ZnPc/BiVO <sub>4</sub> ultrathin nanocomposites                               | ~0.60                            | 500 W Xenon lamp, Vis (λ > 420 nm)           | Angew. Chem. Int. Ed., 2019, <b>58</b> , 10873-10878        |
| <b>MgPc/Bi<sub>2</sub>WO<sub>6</sub> nanosheets</b>                           | <b>0.96</b>                      | <b>500 W Xenon lamp, Vis (λ &gt; 410 nm)</b> | <b>Current study</b>                                        |

**Table S2.** Summary of EIS fitted parameters on the circuit model.

| Sample        | R <sub>s</sub> (Ω) | R <sub>CT</sub> (kΩ) | CPE (μMho) | Goodness of fit |
|---------------|--------------------|----------------------|------------|-----------------|
| BWO           | 10.9               | <b>9.40</b>          | 25.1       | 0.997           |
| 1.0% MgPc-BWO | 25.5               | <b>7.63</b>          | 51.1       | 0.994           |

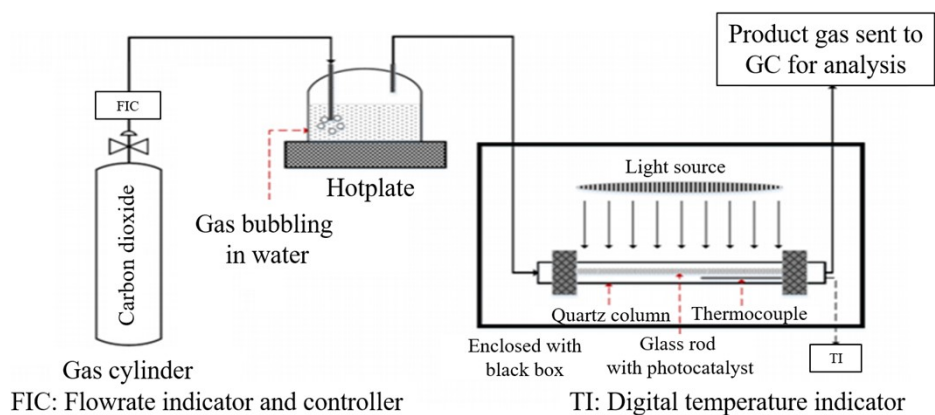

**Fig. S1** Illustration of the photocatalysis rig for the CO<sub>2</sub> photoreduction experiment.

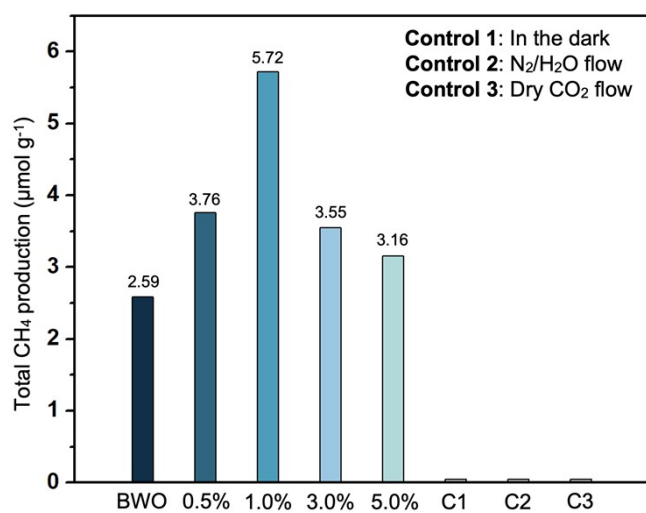

**Fig. S2** Total average yields of CH<sub>4</sub> produced from CO<sub>2</sub>/H<sub>2</sub>O flow over as-synthesized samples after 6 h of visible light irradiation. The control experiments were conducted in the conditions of: (1) in the dark, (2) under N<sub>2</sub>/H<sub>2</sub>O flow, and (3) under dry CO<sub>2</sub> flow.

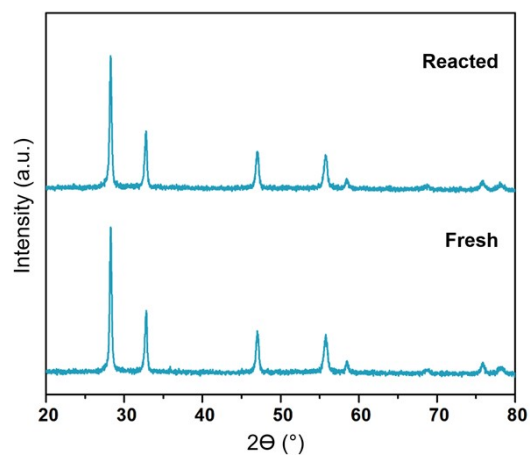

**Fig. S3** XRD spectra of fresh and reacted 1.0% MgPc-BWO.

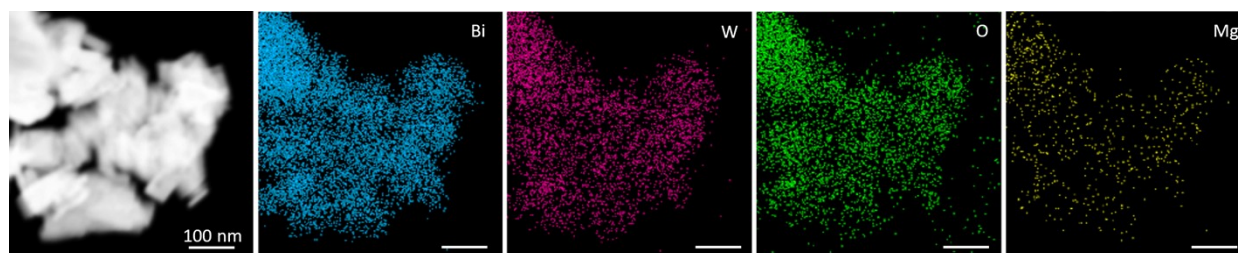

**Fig. S4** EDX mapping of reacted 1.0% MgPc-BWO.

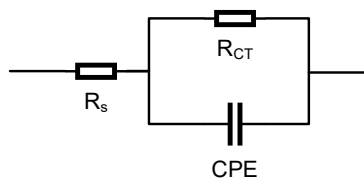

**Fig. S5** Proposed EIS equivalent model circuit.
